# Supplementary material for: Geographic and Genomic Distribution of SARS-CoV-2 Mutations
Source: Front Microbiol. 2020 Jul 22;11:1800. doi: 10.3389/fmicb.2020.01800 (PMC7387429; doi:10.3389/fmicb.2020.01800)
Supplement: Supplementary File 2 — Annotation of samples used in this dataset. [file Table_2.XLSX]

## Sheet: Worldwide
strain
