# Supplementary material for: Geographic and Genomic Distribution of SARS-CoV-2 Mutations
Source: Front Microbiol. 2020 Jul 22;11:1800. doi: 10.3389/fmicb.2020.01800 (PMC7387429; doi:10.3389/fmicb.2020.01800)
Supplement: Supplementary File 7 — Distribution of SARS-CoV-2 clades in all continents at the time of writing. [file Table_7.XLSX]

## Sheet: E
S68F	100
L73F	49
P71L	34
S55F	34
R69I	25
T9I	23
V24M	22
D72H	19
T30I	19
S68C	15
V75L	14
V58F	11
V75F	11
L21F	10
T30A	7
A36	5
R61H	5
V49L	5
V58L	5
D72G	4
F26L	4
L73V	4
R69K	4
S16N	4
S68Y	4
V25A	4
V75	4
D72Y	3
V24L	3
V5I	3
V62F	3
A32S	2
A36V	2
A41S	2
A41V	2
C44*	2
E7K	2
L18F	2
L27F	2
L37F	2
L37H	2
L74P	2
N48S	2
N66H	2
V70F	2
Y42	2
Y59H	2
A22S	1
A41T	1
C44Y	1
D72N	1
E7D	1
E7Q	1
E8G	1
E8K	1
F4L	1
F56	1
F56L	1
G10C	1
G10V	1
I13V	1
KP53NA	1
L19F	1
L19P	1
L19S	1
L27*	1
L27S	1
L28	1
L28I	1
L31P	1
L34	1
L34F	1
L37R	1
L39	1
L39M	1
L51H	1
L65M	1
L65P	1
L73P	1
N45R	1
N66	1
P54S	1
P71H	1
P71S	1
R38	1
R38*	1
R38G	1
S50	1
S50G	1
S6L	1
V17A	1
V24A	1
V29	1
V29A	1
V29G	1
V47F	1
V47G	1
V52E	1
V52I	1
V52L	1
Y2H	1

## Sheet: M
T175M	736
D3G	399
V23L	85
W31C	47
A2V	41
V70F	37
W75L	26
M109I	25
I52T	23
L46F	22
V70I	20
D3Y	19
K162N	19
H125Y	18
K15R	18
D209Y	17
R146H	17
R158C	17
L87F	15
A2S	13
A69S	13
S214I	11
T208I	11
L124F	10
S4F	10
A81S	9
L129M	9
S197N	9
T7I	9
A40S	8
C64F	8
D209H	8
H155Y	8
K15N	8
L29F	8
L34F	8
L90F	8
L129V	6
V10A	6
A85S	5
C33F	5
E11G	5
I80T	5
I8T	5
A142V	4
A85D	4
G6V	4
G78C	4
G78S	4
L16F	4
L17F	4
M84I	4
S212G	4
S4A	4
A188S	3
A188T	3
A194V	3
A63T	3
C64S	3
C86F	3
E167Q	3
G189C	3
L145F	3
Q185R	3
R107H	3
V88I	3
Y204F	3
A68S	2
C33S	2
F53L	2
G79V	2
H148Q	2
I144V	2
I151V	2
I48T	2
K166R	2
L133I	2
R158H	2
R158L	2
S197T	2
V170I	2
V60L	2
V66L	2
V70A	2
V70L	2
W75	2
A104V	1
A142P	1
A152V	1
A194	1
A195	1
A38	1
A38P	1
A38S	1
A40D	1
A40V	1
A63S	1
A68T	1
A69V	1
A85V	1
A98D	1
A98S	1
AY195VH	1
D190N	1
D3	1
E12*	1
E12D	1
E12G	1
E167A	1
E167K	1
F100L	1
F193L	1
F193N	1
F26L	1
F37I	1
F65	1
G126D	1
G126S	1
G153E	1
G182Q	1
G189	1
G189A	1
G192	1
G202	1
G25V	1
G78A	1
G89S	1
H125N	1
H125R	1
H155L	1
H210L	1
H210Y	1
I161M	1
I168V	1
I217L	1
I24T	1
I32F	1
I73A	1
I8S	1
I8V	1
IT168RD	1
K14F	1
K15E	1
K162R	1
K180	1
K205F	1
L138I	1
L13F	1
L149F	1
L156Q	1
L164M	1
L164Q	1
L16I	1
L176P	1
L17I	1
L181V	1
L206S	1
L67F	1
M109V	1
M84T	1
N117H	1
N203	1
N203F	1
N43K	1
N43S	1
N5S	1
N74K	1
P114	1
P123L	1
P132A	1
P132S	1
P165W	1
Q185H	1
Q19E	1
Q19H	1
Q222R	1
QR185HI	1
R107L	1
R131I	1
R186C	1
R198	1
R200	1
R42K	1
S136I	1
S136N	1
S173K	1
S184	1
S184K	1
S191	1
S191L	1
S191T	1
S197	1
S197C	1
S211A	1
S94I	1
S99F	1
T106M	1
T127N	1
T130A	1
T130P	1
T175A	1
T208K	1
T77N	1
V10	1
V10I	1
V88L	1
Y179	1
Y196	1
Y199F	1
Y204	1
Y204H	1

## Sheet: N
RG203KR	14095
S194L	884
S197L	879
P13L	816
D103Y	811
S193I	517
S188L	479
I292T	196
S202N	196
D401Y	141
S190I	134
D22G	126
A208G	123
T205I	121
S183Y	103
S33I	98
D81Y	89
T393I	85
A119S	66
D377Y	65
S37P	63
T247I	61
A156S	57
D128Y	57
P199L	56
R195I	50
P207L	45
E62V	42
R209T	41
T362I	40
G18C	39
T24N	39
R185C	38
S180I	38
M234I	35
Q9H	34
P383L	33
A35S	32
P383S	32
D348H	31
K374N	31
R32H	31
S327L	31
G179C	30
G238C	30
A55S	29
S190G	29
H300Y	28
A119V	27
D144Y	27
L139F	27
P199S	27
P344S	27
P6L	27
R203K	27
P364L	26
R209I	26
S188P	25
A35V	24
K387N	24
P122L	24
R191C	24
R195K	24
T391I	23
A252S	22
Q418L	22
T271I	21
T325I	21
G18V	20
L161F	20
Q289H	20
R203S	20
P162L	19
D340N	18
K373N	18
P168Q	18
A211V	17
D3L	17
G212V	17
K370N	17
P151L	17
T334I	17
A359S	16
G34W	16
P67T	16
R203M	16
D144N	15
R191L	15
S232I	15
D402Y	14
P168S	14
S187L	14
T366I	14
A152S	13
A381T	13
N140T	13
T198I	13
A251V	12
A398V	12
A90S	12
D348Y	12
D377G	12
G204R	12
G243C	12
G34E	12
Q229H	12
R185L	12
T24I	12
T379I	12
A134V	11
N196I	11
P365S	11
Q384H	11
R276I	11
S235F	11
D216A	10
M210I	10
M322I	10
P20S	10
Q389H	10
R209	10
V246I	10
A155V	9
A182S	9
A381V	9
G236C	9
G30V	9
H145Y	9
P6T	9
R209K	9
S194A	9
A336V	8
G19R	8
G30R	8
H145Q	8
K375E	8
K375N	8
L230F	8
N192K	8
Q28E	8
R14L	8
R89I	8
S186Y	8
T166I	8
A173V	7
E280V	7
G19V	7
M234L	7
P13S	7
P67S	7
Q163K	7
Q7H	7
R195G	7
R40C	7
S206F	7
T135I	7
T141I	7
T296I	7
A397V	6
A414V	6
D103N	6
D22Y	6
D399Y	6
E378Q	6
G97S	6
K256*	6
M101I	6
P142S	6
P279L	6
P279S	6
P326L	6
P365L	6
P80L	6
P80S	6
Q390E	6
Q7K	6
R189H	6
R41L	6
RG203KL	6
S193T	6
T263I	6
T417I	6
W330L	6
A208S	5
A217S	5
A218V	5
D63Y	5
E378K	5
G137V	5
G25C	5
K169R	5
N11S	5
N11T	5
N228D	5
P151S	5
Q28R	5
R185H	5
R191H	5
R191S	5
R36L	5
S186F	5
S202I	5
S255F	5
S37L	5
S416L	5
T16M	5
T245A	5
T265I	5
T271A	5
V270L	5
A125T	4
A211S	4
A220V	4
A273S	4
A397P	4
A414S	4
D144H	4
D63N	4
E253A	4
E290D	4
G147S	4
K387R	4
L167F	4
L331F	4
M210T	4
N213Y	4
P13R	4
P13T	4
P207S	4
P20L	4
P326S	4
P383Q	4
P396S	4
P6S	4
Q281R	4
Q28H	4
Q380P	4
Q386H	4
Q418H	4
R93L	4
S23L	4
S26I	4
S413I	4
T76I	4
V72L	4
A119P	3
A12V	3
A138S	3
A252D	3
A254S	3
A308S	3
A311S	3
A311V	3
A376S	3
A381S	3
A398S	3
A419T	3
D343Y	3
D82Y	3
E367K	3
F363L	3
G179D	3
G18S	3
G19E	3
G200S	3
G212C	3
G236V	3
G328V	3
G34V	3
G60R	3
K261	3
N228Y	3
P199T	3
P46S	3
P67L	3
Q239L	3
Q390	3
Q39H	3
Q418*	3
Q7R	3
R10P	3
R177K	3
R319H	3
R32L	3
R36Q	3
R385I	3
R41Q	3
R88L	3
S180C	3
S186P	3
S201G	3
S202C	3
S202G	3
S206P	3
S232T	3
S310C	3
T282I	3
T332I	3
V270I	3
V350F	3
A12S	2
A12T	2
A152V	2
A182T	2
A182V	2
A208	2
A208V	2
A217V	2
A220T	2
A252V	2
A254V	2
A267S	2
A313V	2
A35T	2
A397S	2
A419S	2
A90T	2
D128H	2
D288N	2
D297Y	2
D340Y	2
D371E	2
E62K	2
G120R	2
G129D	2
G164R	2
G214	2
G214C	2
G215S	2
G238S	2
G321D	2
G34L	2
G5E	2
G5V	2
G96C	2
I146F	2
I292L	2
I320V	2
I351T	2
I351V	2
K237N	2
K248N	2
K370Q	2
K61R	2
L221F	2
L382S	2
N154Y	2
N196S	2
N29S	2
P162S	2
P302S	2
P309L	2
P344L	2
P364S	2
P80R	2
Q260L	2
Q380R	2
Q386R	2
Q70R	2
R14C	2
R195	2
R203	2
R32C	2
R40H	2
R68L	2
R95L	2
S180R	2
S250F	2
S2Y	2
S310N	2
S33G	2
S404A	2
T165I	2
T166	2
T16A	2
T205S	2
T325A	2
T329M	2
V246A	2
V392L	2
V72I	2
Y268	2
Y298H	2
A134S	1
A138V	1
A155D	1
A211	1
A211T	1
A218S	1
A251	1
A251S	1
A252	1
A252T	1
A254	1
A267P	1
A267V	1
A273	1
A359T	1
A414T	1
A50E	1
A50V	1
D103E	1
D103F	1
D128E	1
D128N	1
D144E	1
D216H	1
D216N	1
D216Y	1
D22E	1
D288G	1
D297V	1
D340G	1
D343G	1
D343H	1
D343V	1
D348N	1
D371G	1
D371N	1
D371Y	1
D377	1
D377H	1
D399E	1
D399H	1
D3G	1
D3N	1
D3Y	1
D402E	1
D82E	1
DD81EH	1
E118*	1
E136G	1
E174*	1
E174Q	1
E253D	1
E253G	1
E253V	1
E290Q	1
E31D	1
E31Q	1
E323*	1
E378A	1
E62G	1
F110S	1
F346E	1
F363S	1
F363V	1
G116V	1
G120A	1
G120V	1
G124S	1
G129S	1
G137	1
G164V	1
G170C	1
G170S	1
G178C	1
G179S	1
G204	1
G204V	1
G212D	1
G214S	1
G215C	1
G215V	1
G243D	1
G25D	1
G25F	1
G25V	1
G278R	1
G284E	1
G30A	1
G316E	1
G321R	1
G328*	1
G44V	1
G99C	1
H300Q	1
HW300QR	1
I131V	1
I157T	1
I15L	1
I337F	1
I337V	1
I351M	1
I74	1
I84	1
I94V	1
K100R	1
K233	1
K248R	1
K249I	1
K249R	1
K266N	1
K299T	1
K338E	1
K342N	1
K347N	1
K347R	1
K370R	1
K372R	1
K372S	1
K373M	1
K373R	1
K387T	1
K38T	1
K405	1
K405R	1
K61N	1
KD347NP	1
L104F	1
L113I	1
L121H	1
L139	1
L161H	1
L221S	1
L224I	1
L227F	1
L291Q	1
L339F	1
L382K	1
L395F	1
L407W	1
M210	1
M317I	1
M322T	1
N140	1
N140K	1
N192S	1
N196Y	1
N213S	1
N27K	1
N27Y	1
N285H	1
N29T	1
N354S	1
N48I	1
N4D	1
P117L	1
P117S	1
P13H	1
P151H	1
P168L	1
P20	1
P279	1
P309	1
P309S	1
P326	1
P326H	1
P364Q	1
P364R	1
P365	1
P368A	1
P396H	1
P80T	1
PA207QT	1
Q160P	1
Q163R	1
Q181E	1
Q229*	1
Q241L	1
Q242	1
Q244K	1
Q244R	1
Q272H	1
Q272L	1
Q272R	1
Q28*	1
Q281K	1
Q281L	1
Q283H	1
Q28L	1
Q294L	1
Q306H	1
Q380H	1
Q386K	1
Q389L	1
Q390H	1
Q390K	1
Q408R	1
Q409H	1
Q409R	1
Q70*	1
Q83R	1
QA380HP	1
QG43LR	1
R14H	1
R185P	1
R189L	1
R191G	1
R195L	1
R203I	1
R226S	1
R259	1
R259Q	1
R262H	1
R319S	1
R385K	1
R385S	1
R385T	1
R40L	1
R41P	1
R41W	1
R68Q	1
R92S	1
R95C	1
S105N	1
S176G	1
S180G	1
S180T	1
S183F	1
S183P	1
S183T	1
S184P	1
S188	1
S190N	1
S193	1
S193C	1
S197*	1
S201	1
S201I	1
S206C	1
S21L	1
S21T	1
S232R	1
S235P	1
S23P	1
S23T	1
S255	1
S255A	1
S255P	1
S26C	1
S26G	1
S310I	1
S327P	1
S33N	1
S410F	1
S412	1
S412I	1
S412N	1
S412T	1
S413N	1
S79T	1
T135N	1
T135P	1
T141P	1
T148I	1
T247A	1
T263	1
T263A	1
T265A	1
T325R	1
T329	1
T334S	1
T362K	1
T366A	1
T366P	1
T379N	1
T417A	1
T91	1
TV391IL	1
V246F	1
V324A	1
V324F	1
V350A	1
V392	1
W108C	1
W301C	1
Y298	1

## Sheet: NSP1
M85	328
D75E	324
G82	317
V84	251
P80	247
H83	240
V86	231
H81	227
E87	222
L88	222
K141	177
A79	148
V89	112
V56I	63
R124C	42
D75G	40
A90	37
Y118C	31
D139N	24
Y136	24
G30D	23
R24C	22
D139Y	19
E37K	19
H45Y	19
H110Y	18
G52S	17
I71V	15
D156	14
A76T	13
E37D	13
S135	13
S166G	13
A138T	12
F157	12
G49C	12
M85I	11
D144A	10
A138V	9
E2D	9
E87D	9
G150C	9
G7D	9
L27F	9
R43C	9
A90V	8
V54I	8
G82S	7
H13Y	7
I114T	7
K120N	7
D147N	6
D33N	6
G146C	6
H81Y	6
L92F	6
R29C	6
T12I	6
E57G	5
G112S	5
G59D	5
L122F	5
V121F	5
A117T	4
A117V	4
A76V	4
G112D	4
G49D	4
H83R	4
H83Y	4
L39S	4
L4I	4
R99C	4
S142L	4
V169A	4
E159K	3
G105S	3
G7C	3
K129N	3
L140	3
L149R	3
P6L	3
R119H	3
R77Q	3
S100C	3
V35L	3
V35M	3
V38F	3
E155	2
E2G	2
E2K	2
E93K	2
F143S	2
G112C	2
G150D	2
G7A	2
G82D	2
G98V	2
H110Q	2
K141E	2
L104F	2
L107F	2
L16F	2
L61W	2
P62L	2
P62S	2
P6S	2
P80S	2
R175H	2
R43H	2
R43L	2
R73C	2
S3R	2
S40P	2
S74L	2
T78I	2
V106I	2
V116M	2
V54	2
V60F	2
V60I	2
Y118H	2
A117S	1
A131T	1
A138S	1
A76P	1
A79T	1
A90T	1
D139G	1
D147E	1
D152A	1
D152G	1
D152V	1
D25G	1
D33G	1
D48E	1
D48N	1
D75N	1
D75Y	1
E102G	1
E102K	1
E10D	1
E159G	1
E172K	1
E172Q	1
E176G	1
E2*	1
E41D	1
E41G	1
E55K	1
E57D	1
E65G	1
E65L	1
E87K	1
E93*	1
E93D	1
EL91DI	1
F143C	1
F143L	1
F31L	1
F31V	1
F8L	1
F8V	1
G101S	1
G112V	1
G127D	1
G130V	1
G132S	1
G133C	1
G133D	1
G137A	1
G137C	1
G137D	1
G137V	1
G146D	1
G150A	1
G168V	1
G179*	1
G179R	1
G30C	1
G32	1
G59C	1
G7S	1
G7V	1
H110R	1
H81R	1
H83N	1
HV83RR	1
I95T	1
I95V	1
K120E	1
K141R	1
K47N	1
L104H	1
L104I	1
L122I	1
L122R	1
L123F	1
L145F	1
L149F	1
L149H	1
L18	1
L21S	1
L27R	1
L46F	1
L46P	1
L4F	1
L53V	1
L61F	1
L92H	1
M85V	1
N128D	1
N160K	1
N162Y	1
N9Y	1
P115L	1
P115S	1
P80L	1
Q15L	1
Q63H	1
Q66H	1
Q96H	1
R175C	1
R175G	1
R77	1
R77L	1
R99H	1
S100N	1
S142	1
S142A	1
S142P	1
S167T	1
S17C	1
S34F	1
S74	1
S74P	1
T103I	1
T151G	1
T163I	1
T78A	1
V106A	1
V111L	1
V116L	1
V121D	1
V121I	1
V23A	1
V23F	1
V28I	1
V5	1
V54A	1
V56A	1
V56F	1
V5I	1
V86A	1
V86F	1
V89I	1
Y136C	1
Y68*	1
Y68H	1

## Sheet: NSP10
D64E	106
P136S	34
A104V	20
A32V	20
T12I	18
T111I	16
P84S	14
T51I	7
I55V	6
T102I	6
T51A	5
I81L	4
M63T	4
N62K	4
R134C	4
A20V	3
K95R	3
L138F	3
P8S	3
T118A	3
T49I	3
A18V	2
A24T	2
A32S	2
A4V	2
D91E	2
I81T	2
K43R	2
L112F	2
L133F	2
M122I	2
M137T	2
M63I	2
N105S	2
P8L	2
T118N	2
T39I	2
V119I	2
W123C	2
Y126*	2
Y126F	2
A104	1
A1V	1
A20S	1
A24	1
A24S	1
A24V	1
A4T	1
A61S	1
C103	1
C103R	1
C120S	1
C130S	1
D131H	1
D64G	1
D82G	1
E60A	1
F68L	1
G121S	1
G125C	1
G125S	1
G34	1
G34R	1
G50C	1
G88*	1
I99L	1
K124T	1
K93R	1
K95N	1
L133I	1
L138I	1
M137V	1
M63K	1
M63V	1
N3T	1
P136L	1
P136T	1
P37S	1
P84L	1
P86L	1
Q132L	1
Q36K	1
R134S	1
R78C	1
S129C	1
S129G	1
S129N	1
T101I	1
T115I	1
T47I	1
T49S	1
T58I	1
T5I	1
V13I	1
Y30N	1

## Sheet: NSP12a
S6L	111
A2V	2
A4V	2
A2D	1
A2S	1
A2T	1
A4	1
A4T	1
D3E	1
D3G	1
F7	1
Q5*	1
S1	1
S1L	1

## Sheet: NSP12b
P314L	36444
A88V	801
T132I	482
A440V	398
S425F	242
M657I	144
D54Y	127
H604Y	62
S638I	59
A34V	58
P218L	55
M371I	52
E913D	47
M620I	44
G765S	43
M592I	37
E427G	34
N482S	33
Q813H	31
A434V	30
T76I	30
A414V	29
M454I	29
T17I	29
A647T	28
A241V	27
M659I	24
T797I	24
T267M	22
T792N	21
V579L	21
K258N	20
V871I	19
K709R	18
L505F	18
F406S	17
T243N	17
Y29H	17
E735D	16
H743Q	16
I162V	16
S904L	16
A517V	15
A373V	14
G219C	14
G35V	14
P85L	14
V466	14
E75K	13
K50N	13
P821S	13
T899I	13
P12S	12
T239I	12
D870Y	11
G99D	11
K771N	11
K82R	11
R270S	11
S424G	11
A390V	10
D436N	10
D884Y	10
G662S	10
H863Y	10
K94N	10
R240W	10
T635M	10
V658I	10
A302S	9
K798R	9
M115I	9
T861I	9
V290F	9
A762V	8
D815Y	8
F213L	8
H346Y	8
I162M	8
L177V	8
P255S	8
T76S	8
V396F	8
V839L	8
A176S	7
A374V	7
E867D	7
G16Y	7
L627I	7
N141S	7
P314F	7
T310I	7
T730I	7
V138I	7
V396I	7
V415L	7
A370S	6
A37S	6
A517S	6
A576V	6
A690S	6
A869S	6
A914S	6
C84S	6
D152Y	6
D275Y	6
G814S	6
H873R	6
K417N	6
K469N	6
L320I	6
L860F	6
M747I	6
P218S	6
Q348H	6
S220N	6
S59F	6
T11I	6
T634I	6
T67I	6
V345L	6
A176V	5
A244V	5
A647V	5
A7V	5
D144G	5
D20E	5
D53Y	5
D727G	5
D795Y	5
HE73Q*	5
L820F	5
M809I	5
P103S	5
R240K	5
S442I	5
S786F	5
V329I	5
V596A	5
V666F	5
V839I	5
W907C	5
Y154C	5
Y512C	5
Y819H	5
A520V	4
A545V	4
A651S	4
A869V	4
A86V	4
D131Y	4
D144Y	4
D152V	4
D58N	4
E268A	4
E269D	4
E910D	4
H716Y	4
H73Y	4
L252*	4
L627F	4
L629F	4
M101V	4
M187I	4
P909S	4
Q72E	4
Q866H	4
S309A	4
T217M	4
T237I	4
T284I	4
T794I	4
V119I	4
V165	4
V165I	4
Y665H	4
A616S	3
A647S	3
A831S	3
A86T	3
C455F	3
D815G	3
E74*	3
H247P	3
H801L	3
H919Y	3
I457T	3
K151N	3
K771R	3
K82E	3
K94R	3
L177F	3
L203I	3
L363F	3
M557I	3
N189H	3
N79S	3
P319S	3
P452S	3
Q435H	3
R109H	3
R123M	3
R164C	3
S220G	3
S425P	3
T15I	3
T315I	3
T393I	3
T595I	3
V248F	3
V33L	3
V345A	3
V389I	3
V578I	3
V733A	3
W281C	3
Y868C	3
A167T	2
A244S	2
A244T	2
A34T	2
A370V	2
A391S	2
A397V	2
A625S	2
A869T	2
D100Y	2
D131G	2
D145G	2
D145Y	2
D152N	2
D295Y	2
D31G	2
D409N	2
D51Y	2
D702Y	2
D727N	2
D729Y	2
D892Y	2
E158K	2
E793D	2
E908K	2
E913V	2
F278	2
F398L	2
F431L	2
G376S	2
G662C	2
G662V	2
H563Y	2
H873Y	2
H883Y	2
I136T	2
I441V	2
I457V	2
I539V	2
I570V	2
I748V	2
I838S	2
I847V	2
K565	2
K705E	2
K709N	2
K771T	2
L137F	2
L261F	2
L273I	2
L357	2
L605F	2
L621F	2
L639F	2
M606I	2
M624V	2
M657T	2
M659L	2
M893I	2
M897I	2
M915R	2
N291D	2
N377S	2
N395T	2
N55S	2
N602D	2
N725Y	2
P12L	2
P160S	2
P223S	2
P528S	2
P800R	2
Q283H	2
Q515L	2
Q561H	2
Q866R	2
R123S	2
R188Q	2
R724K	2
R741C	2
R741H	2
S18N	2
S316I	2
S540N	2
S598R	2
T385M	2
T42I	2
T792A	2
T794A	2
V225A	2
V22A	2
V290A	2
V311L	2
V326F	2
V463L	2
V464F	2
V691A	2
V711F	2
V818L	2
V839E	2
W500C	2
Y597C	2
Y710C	2
A116S	1
A176T	1
A186T	1
A190S	1
A244G	1
A25V	1
A367G	1
A370P	1
A373T	1
A391V	1
A397S	1
A414	1
A414S	1
A434D	1
A440I	1
A440T	1
A520S	1
A520T	1
A538T	1
A538V	1
A541V	1
A545D	1
A545T	1
A549S	1
A549V	1
A572G	1
A572S	1
A572T	1
A576S	1
A630V	1
A679S	1
A693T	1
A707G	1
A768S	1
A768T	1
A7T	1
A831T	1
A86S	1
A8T	1
C292	1
C301F	1
C386*	1
C3F	1
C478S	1
C650*	1
C721F	1
C833G	1
D100V	1
D131A	1
D146G	1
D161G	1
D161V	1
D161Y	1
D185E	1
D249N	1
D249Y	1
D251E	1
D251Y	1
D294N	1
D294Y	1
D31N	1
D327Y	1
D349Y	1
D436G	1
D436Y	1
D468G	1
D472G	1
D475A	1
D490E	1
D58G	1
D675E	1
D675G	1
D702N	1
D795E	1
D816G	1
D816Y	1
D837H	1
D837Y	1
D870G	1
D884H	1
D98N	1
E245D	1
E245V	1
E341D	1
E361G	1
E427K	1
E427L	1
E52A	1
E720D	1
E74K	1
E75V	1
E787A	1
E787G	1
E913G	1
ED513DY	1
F148S	1
F26	1
F291	1
F317Y	1
F331L	1
F36N	1
F39I	1
F420	1
F432L	1
F61C	1
F643L	1
F68S	1
F803Y	1
F834L	1
G128V	1
G16C	1
G170C	1
G170S	1
G170V	1
G205L	1
G318*	1
G336	1
G35C	1
G423	1
G423*	1
G494V	1
G575*	1
G575R	1
G575V	1
G587S	1
G661C	1
G661D	1
G661S	1
G670R	1
G703S	1
G703V	1
G765C	1
G799E	1
G814V	1
H124Q	1
H247Y	1
H286Y	1
H372	1
H563S	1
H66Q	1
H801Y	1
H807Y	1
I105M	1
I105V	1
I136M	1
I136V	1
I162L	1
I192F	1
I192L	1
I214M	1
I235L	1
I235M	1
I257V	1
I324M	1
I324T	1
I324V	1
I441	1
I479T	1
I479V	1
I485V	1
I527T	1
I530T	1
I553V	1
I570M	1
I580V	1
I828V	1
I838	1
I97M	1
I97V	1
K134R	1
K150N	1
K150Q	1
K254N	1
K279R	1
K360N	1
K421M	1
K421R	1
K469T	1
K502N	1
K50R	1
K584	1
K594N	1
K82N	1
L10F	1
L137I	1
L163V	1
L238F	1
L252C	1
L293M	1
L342P	1
L352	1
L40I	1
L461R	1
L566	1
L567S	1
L654*	1
L698	1
L698F	1
L740*	1
L749	1
L749I	1
L777N	1
L796F	1
L820I	1
L874F	1
L898F	1
LI381	1
M101L	1
M510I	1
M510T	1
M533L	1
M592K	1
M592L	1
M606T	1
M620V	1
M624T	1
M657K	1
M746R	1
M785T	1
M890I	1
M893T	1
M897V	1
M915I	1
N129D	1
N159S	1
N204K	1
N288K	1
N288S	1
N30Y	1
N351K	1
N395S	1
N405K	1
N405S	1
N480K	1
N525K	1
N55I	1
N682K	1
N686D	1
N696D	1
N725D	1
N725S	1
N725T	1
N734S	1
N781	1
N865D	1
N865S	1
N900D	1
N900K	1
N900S	1
P218A	1
P223T	1
P255L	1
P314H	1
P314S	1
P314T	1
P369L	1
P403	1
P403R	1
P452	1
P452T	1
P618L	1
P618S	1
P668S	1
P800	1
P800S	1
P800T	1
P825S	1
P85S	1
P909L	1
Q108L	1
Q182L	1
Q72	1
Q813R	1
R109F	1
R164G	1
R164H	1
R172C	1
R172L	1
R174C	1
R1Q	1
R240G	1
R240M	1
R240S	1
R276H	1
R322K	1
R322S	1
R340G	1
R340S	1
R448C	1
R524L	1
R574G	1
R631H	1
R642H	1
R717S	1
R880K	1
R9C	1
S18G	1
S220I	1
S227A	1
S309T	1
S354	1
S354I	1
S354N	1
S355	1
S355F	1
S416	1
S425	1
S509L	1
S511I	1
S555I	1
S583N	1
S583T	1
S598I	1
S598N	1
S663P	1
S69A	1
S69P	1
S759N	1
S763F	1
S763Y	1
S852A	1
SE655RK	1
T111I	1
T139I	1
T15A	1
T180K	1
T197I	1
T19A	1
T217A	1
T250A	1
T253A	1
T253I	1
T267A	1
T384I	1
T384N	1
T393A	1
T400I	1
T582I	1
T671A	1
T677K	1
T692M	1
T701I	1
T76A	1
T794S	1
T797A	1
T808I	1
T841I	1
T861A	1
V102I	1
V102L	1
V173L	1
V181I	1
V193F	1
V22	1
V225	1
V22I	1
V248I	1
V2A	1
V306F	1
V306G	1
V321E	1
V321L	1
V329F	1
V332	1
V389A	1
V401I	1
V415	1
V415M	1
V463I	1
V464D	1
V466I	1
V467F	1
V526A	1
V551D	1
V600I	1
V628L	1
V691I	1
V695A	1
V728F	1
V733M	1
V754I	1
V767E	1
V767L	1
V783A	1
V811F	1
V896A	1
V896I	1
W153C	1
W259C	1
W281*	1
W608L	1
W907L	1
Y140*	1
Y23H	1
Y256G	1
Y29D	1
Y365	1
Y365C	1
Y447*	1
Y610D	1
Y71C	1
Y723*	1
Y779	1
Y819N	1
Y906N	1

## Sheet: NSP13
Y541C	1780
P504L	1736
A18V	518
R392C	151
P47L	132
S485L	118
L297P	116
H290Y	94
T127I	54
L176F	45
V193I	45
V570L	45
D260Y	44
V49I	40
Q518H	39
S468L	39
A598V	35
D204Y	33
S74L	33
T588I	32
G206C	31
V226L	31
V348L	30
M576I	28
A302D	27
P53S	27
T481M	27
K524N	26
A338V	24
P419S	24
V479F	24
P77L	21
V169F	21
N124S	20
P78S	20
S80G	20
V496L	20
A4V	18
T413I	18
A296S	17
A368S	17
K460R	17
L297F	17
P172S	17
A302S	16
P402S	16
T530I	16
L428F	15
P504S	15
A368V	14
D458Y	14
P364S	14
S74P	14
T416A	14
A568V	13
M474I	13
S166L	13
S350L	13
D344N	12
E341D	12
I432T	12
L581F	12
S38L	12
T250I	12
Y253H	12
A509V	11
E244D	11
H164Y	11
S74A	11
T141I	11
V356F	11
E319D	10
E365D	10
G170S	10
L526F	10
R155C	10
Y396C	10
A208V	9
A403S	9
I151V	9
M233I	9
M474V	9
P300L	9
P47S	9
T153I	9
V247F	9
V452L	9
A407V	8
D369G	8
L256F	8
M429I	8
P238L	8
P254L	8
R392S	8
S259L	8
T550A	8
A553V	7
E261D	7
F475V	7
K271T	7
K345R	7
R178*	7
R303H	7
T188N	7
V187L	7
V209F	7
A108S	6
A140S	6
G206V	6
N102S	6
P53L	6
Q531H	6
T115I	6
V570I	6
A208S	5
A469S	5
A505V	5
G54C	5
H245Y	5
L280F	5
P529L	5
S100I	5
S236G	5
S523A	5
T115A	5
T214I	5
T239I	5
T380I	5
T599I	5
V210I	5
V98F	5
A237T	4
A296T	4
A379V	4
A389V	4
A446S	4
A446V	4
D466N	4
H464Y	4
I121V	4
K276R	4
L325F	4
M274I	4
M68V	4
N388T	4
R129K	4
R442Q	4
T111I	4
T351I	4
V456A	4
V484F	4
Y71C	4
A110S	3
A336T	3
A505S	3
A52V	3
A568T	3
A598S	3
D207G	3
D450V	3
D59Y	3
G170V	3
G91C	3
I195T	3
I304M	3
I304V	3
I480V	3
I575M	3
K329R	3
L297I	3
L43F	3
P238S	3
Q281H	3
R595K	3
S236I	3
S278F	3
S278Y	3
S36P	3
S539L	3
T137M	3
T279I	3
T431I	3
V221F	3
V241L	3
V305M	3
Y355C	3
Y382H	3
A108V	2
A140V	2
A237V	2
A292S	2
A308T	2
A463T	2
A469V	2
A520V	2
A553S	2
A85S	2
C444Y	2
D101Y	2
D223V	2
D466E	2
E168Q	2
E591D	2
F472L	2
G118V	2
G170D	2
G439R	2
G54S	2
G87E	2
H245R	2
I195V	2
I20T	2
I293V	2
I327V	2
I370V	2
I493V	2
I575V	2
K271N	2
K40R	2
K477R	2
L280H	2
L363F	2
M68T	2
N265K	2
N459	2
N503K	2
N503S	2
N51Y	2
P242S	2
P254S	2
P402L	2
P445S	2
P78L	2
R339H	2
R339L	2
S100G	2
S263P	2
S310A	2
S36L	2
S80N	2
T250A	2
T255I	2
T501I	2
T547I	2
V45I	2
V510A	2
Y224H	2
Y324C	2
Y421H	2
A135V	1
A208T	1
A237S	1
A267T	1
A267V	1
A296V	1
A302V	1
A321T	1
A336V	1
A362V	1
A446T	1
A454T	1
A4S	1
A509G	1
C16S	1
C30	1
C30S	1
C342Y	1
C441G	1
C441S	1
C471S	1
C84*	1
D105G	1
D119G	1
D204N	1
D207Y	1
D32H	1
D466Y	1
D542G	1
D56Y	1
D580G	1
E128G	1
E201A	1
E365G	1
E365V	1
E418K	1
E447K	1
E551K	1
E591K	1
F106Y	1
F225I	1
F346L	1
F357L	1
F472I	1
F475L	1
F499L	1
F511S	1
F546S	1
F587L	1
G150R	1
G170C	1
G17C	1
G203C	1
G213S	1
G287V	1
G294C	1
G294D	1
G433S	1
G439V	1
G538C	1
G54V	1
H290R	1
H311N	1
H311Q	1
H33Q	1
I109L	1
I121T	1
I258P	1
I258T	1
I304L	1
I333L	1
I334V	1
I370E	1
I370T	1
I399V	1
I488S	1
I545M	1
I565V	1
I572V	1
I592V	1
I79T	1
K131R	1
K192E	1
K202R	1
K276N	1
K345N	1
K394N	1
K465E	1
K477N	1
K508E	1
K508R	1
K524R	1
K569E	1
L138I	1
L165F	1
L322	1
L322I	1
L417I	1
L41V	1
L438P	1
L455F	1
L455M	1
L461H	1
L500H	1
L573F	1
L581I	1
L600	1
M274V	1
M378I	1
M436L	1
M436R	1
M436V	1
N124D	1
N124H	1
N190D	1
N220S	1
N268S	1
N503Y	1
N562D	1
P234L	1
P23S	1
P364H	1
P402T	1
P434S	1
P77T	1
P82S	1
Q11	1
Q11*	1
Q275K	1
Q354H	1
Q470K	1
Q531K	1
Q537*	1
Q586H	1
Q586R	1
Q601*	1
Q601K	1
Q62H	1
Q62L	1
R155L	1
R161I	1
R173K	1
R22I	1
R248G	1
R248I	1
R337L	1
R392H	1
R392L	1
R507E	1
R579K	1
R594H	1
R594L	1
R595G	1
R595M	1
R595S	1
S10	1
S10*	1
S10L	1
S148F	1
S166*	1
S166A	1
S264N	1
S301F	1
S301T	1
S301Y	1
S310F	1
S424T	1
S468T	1
S74T	1
T104A	1
T115K	1
T127	1
T12I	1
T153N	1
T255A	1
T307I	1
T351A	1
T367A	1
T410I	1
T416P	1
T431A	1
T440I	1
T58I	1
T61A	1
T61I	1
T96K	1
V169A	1
V221A	1
V221G	1
V241M	1
V247A	1
V2A	1
V2I	1
V314D	1
V340A	1
V340L	1
V360I	1
V371F	1
V371G	1
V386I	1
V397A	1
V425L	1
V425M	1
V449D	1
V456F	1
V456I	1
V496A	1
V496G	1
V496I	1
V558L	1
V57D	1
V60G	1
W506*	1
W506C	1
Y149C	1
Y246H	1
Y269C	1
Y298H	1
Y31	1
Y324H	1
Y398C	1
Y70	1

## Sheet: NSP14
A320V	374
F233L	313
T250I	111
V182L	96
A225V	71
R289C	48
A274S	42
P24L	40
I150T	38
S374A	38
H26Y	37
L177F	34
L157F	33
T16I	33
A482V	30
P297S	27
V120A	27
S255I	26
P203L	25
A23	24
K311N	24
M72I	24
V290F	24
F431L	21
K349N	21
M58I	21
P140S	21
R205C	21
T193A	21
L409F	19
P443S	19
Y260C	19
D345G	18
E204D	16
R163C	16
R81K	16
T524I	16
T113I	15
T31I	15
L493F	14
A119V	13
D345Y	13
M501I	13
A360V	12
A371V	11
T206I	11
V287F	11
A360S	10
I74T	10
M315I	10
P142L	10
Q343K	10
A323V	9
I15T	9
M153I	9
P327S	9
P43L	9
S369F	9
V263F	9
V316F	9
A138V	8
D324Y	8
M195T	8
P121L	8
H455Y	7
P297L	7
P46S	7
T516I	7
V14L	7
V381I	7
Y420*	7
A119S	6
A214V	6
C216F	6
M49I	6
P412S	6
P43S	6
Q354H	6
R212K	6
T16N	6
T215I	6
T372I	6
T378I	6
Y124	6
A394V	5
D222Y	5
F217Y	5
H314Y	5
I15V	5
I275T	5
K311E	5
P239L	5
P355S	5
Q22H	5
S357N	5
S503L	5
T173I	5
A220V	4
A23S	4
D324E	4
F217L	4
G248V	4
G380C	4
G481V	4
G59C	4
I201V	4
I502L	4
M62I	4
P158L	4
P158S	4
P429L	4
P46L	4
R213L	4
S461L	4
T5A	4
T97I	4
V125F	4
V167L	4
V316	4
V341L	4
A435V	3
A504V	3
D132Y	3
D211G	3
D464Y	3
D48N	3
D496N	3
D496Y	3
E453D	3
F133L	3
F198C	3
G17W	3
G248C	3
H95Y	3
I474V	3
K13N	3
L174F	3
L27F	3
L508F	3
M169I	3
N67S	3
P158H	3
P203S	3
P451L	3
R76L	3
R81I	3
R98S	3
S28G	3
S357I	3
S374F	3
T475A	3
T5I	3
V421L	3
V460L	3
Y224C	3
A220T	2
A281T	2
A323S	2
A353V	2
A430V	2
A85S	2
A96V	2
C382F	2
D132N	2
D222N	2
D291N	2
D291Y	2
D375Y	2
D415A	2
E204A	2
F33L	2
F444L	2
G114S	2
G114V	2
G300D	2
G37V	2
G481C	2
H148Y	2
I299M	2
I305V	2
I363V	2
K165N	2
K304N	2
K376R	2
K433Q	2
K47R	2
L152F	2
L366F	2
L442V	2
M241I	2
M57I	2
M58L	2
N129T	2
N176T	2
N238S	2
P142S	2
P151S	2
P393L	2
P443L	2
P70L	2
S137I	2
S418	2
S461P	2
T131I	2
T219I	2
T293I	2
T472M	2
T516N	2
V125I	2
V14I	2
V182I	2
V199L	2
V236F	2
V398I	2
W247C	2
Y498H	2
A100S	1
A220	1
A267E	1
A281S	1
A323	1
A323T	1
A337V	1
A344V	1
A425S	1
A425T	1
A430	1
A430S	1
A430T	1
A435	1
A497V	1
A504	1
A504D	1
A96S	1
C208F	1
C382S	1
C387Y	1
C473*	1
C477Y	1
D144E	1
D211A	1
D211Y	1
D222V	1
D258A	1
D258G	1
D258Y	1
D301Y	1
D324A	1
D345N	1
D352E	1
D358E	1
D375G	1
D379A	1
D415G	1
D432Y	1
D496G	1
D496V	1
D515H	1
E2	1
E204G	1
E284G	1
E302Q	1
E347D	1
E364Q	1
E365K	1
E77K	1
E77V	1
F111Y	1
F326I	1
F377L	1
F384Y	1
F426L	1
F431C	1
F436S	1
F445I	1
F89L	1
G110V	1
G123A	1
G189C	1
G265V	1
G300C	1
G300S	1
G416S	1
G44C	1
G44D	1
G456*	1
G456E	1
G481S	1
G59V	1
H148L	1
H188Q	1
H188Y	1
H264R	1
H283R	1
H314Q	1
H330Y	1
H427	1
H455R	1
H487P	1
H82L	1
I150V	1
I15N	1
I166T	1
I201L	1
I231T	1
I294T	1
I298V	1
I332V	1
I42L	1
I42T	1
I42V	1
I45L	1
I45M	1
I463V	1
I55V	1
I74F	1
I74V	1
I80L	1
I80T	1
I87M	1
I87V	1
K13R	1
K165	1
K175	1
K175E	1
K196	1
K196E	1
K288N	1
K288T	1
K311R	1
K318E	1
K32E	1
K32R	1
K339N	1
K47E	1
K47N	1
L117I	1
L157P	1
L185V	1
L27I	1
L411F	1
L419	1
L419W	1
L439*	1
L442	1
L479*	1
L493	1
L493S	1
L495P	1
L508	1
M195I	1
M241V	1
M500T	1
M501L	1
M501T	1
M501V	1
M58K	1
M72L	1
N130S	1
N252I	1
N306S	1
N438S	1
N438T	1
N489D	1
N67Y	1
N71Y	1
P106	1
P121A	1
P239A	1
P24S	1
P327L	1
P342L	1
P393S	1
P412H	1
P70S	1
Q22*	1
Q254H	1
Q254L	1
Q458H	1
Q513P	1
Q65L	1
R180K	1
R205L	1
R278S	1
R485G	1
R52L	1
R81S	1
S218F	1
S221	1
S221*	1
S221T	1
S255G	1
S396A	1
S418G	1
S434I	1
S434N	1
S448Y	1
S450T	1
S470A	1
S470F	1
S507I	1
S56F	1
T193K	1
T215	1
T215A	1
T219P	1
T223	1
T223C	1
T372A	1
T372R	1
T50A	1
T522I	1
T75I	1
V101F	1
V101I	1
V115I	1
V118I	1
V161L	1
V162	1
V162L	1
V184F	1
V236I	1
V244I	1
V263I	1
V269I	1
V312A	1
V312F	1
V316A	1
V328A	1
V389A	1
V40A	1
V421I	1
V437F	1
V459I	1
V459L	1
V83L	1
V91I	1
W348*	1
W385L	1
W520C	1
WI86CF	1
Y124C	1
Y154N	1
Y235	1
Y235C	1
Y235F	1
Y361*	1
Y361N	1
Y420C	1
Y494N	1
Y64F	1
Y69F	1

## Sheet: NSP15
V320L	277
A217V	214
V22L	132
V172L	118
D219N	66
P205S	57
V127F	49
Q19H	43
M218	31
A92V	30
D282G	30
I252V	28
T33I	26
G129S	23
L331F	23
A81V	22
V69L	21
S312F	20
T325I	20
A171V	18
R206S	18
D272Y	17
D87N	17
S288F	16
K109R	15
P270S	15
P65S	15
D267Y	14
D128Y	13
E215I	13
T144I	13
S261L	12
S287L	12
T112I	12
E260K	11
P205L	11
S161I	11
V66L	11
D39Y	10
T114A	10
D91Y	9
K109N	9
R257C	9
S147I	9
S154F	9
A137V	8
D219Y	8
D282Y	8
H234Y	8
K12N	8
T114M	8
V9F	8
I143V	7
K173E	7
M271I	7
N11S	7
P270L	7
T48I	7
V22I	7
D36Y	6
E41D	6
G17E	6
G286C	6
H337Y	6
I107L	6
I222S	6
K316N	6
K64E	6
P262S	6
S261A	6
T321I	6
D132G	5
D335Y	5
E220Q	5
G169E	5
G76D	5
P118S	5
R135K	5
V10L	5
V148A	5
V314I	5
A6V	4
D219G	4
D282N	4
G156A	4
G169R	4
G20V	4
G246C	4
G286V	4
G76S	4
I115S	4
K289N	4
L162F	4
P262L	4
P343S	4
P65L	4
S273I	4
T114K	4
V141I	4
V182F	4
V291L	4
A160V	3
A283V	3
A94T	3
D132Y	3
D183G	3
D212G	3
D310Y	3
E304A	3
F123	3
F232Y	3
F263	3
G129D	3
G129V	3
G13E	3
G146C	3
G146S	3
G164E	3
H14Y	3
I107V	3
I222M	3
I222V	3
K158E	3
K34E	3
K60N	3
L162R	3
L250I	3
M209I	3
M218I	3
P111S	3
P23S	3
S147G	3
S293T	3
S328L	3
V236I	3
V303F	3
V317F	3
V35F	3
W332C	3
A117V	2
A231V	2
A255S	2
A255V	2
C290F	2
D124Y	2
D128N	2
D16G	2
D183Y	2
D212E	2
D239N	2
D36G	2
E170K	2
E21K	2
E56D	2
E68G	2
F15L	2
F221L	2
F240	2
F302L	2
F55L	2
G184C	2
G336V	2
H95R	2
I168T	2
I235V	2
I269	2
I26T	2
I27T	2
I79L	2
M330I	2
M330V	2
N177Y	2
N199S	2
N62D	2
N82S	2
P111L	2
P118L	2
P50S	2
Q175H	2
Q244H	2
R135I	2
R138C	2
R138S	2
S241N	2
T195I	2
T281I	2
V10I	2
V127I	2
V148F	2
V155I	2
V172I	2
W332L	2
Y342C	2
A117T	1
A160G	1
A160S	1
A171T	1
A283T	1
A80P	1
A80S	1
A81T	1
A94S	1
C116F	1
D128G	1
D16E	1
D183H	1
D239A	1
D239G	1
D239Y	1
D267A	1
D272G	1
D282	1
D282H	1
D310G	1
D335N	1
D78G	1
D87Y	1
E113D	1
E113G	1
E113V	1
E202*	1
E215A	1
E220K	1
E223G	1
E264	1
E264G	1
E266	1
E304G	1
E304K	1
E339	1
E339G	1
E339K	1
E3K	1
E68D	1
F122I	1
F122L	1
F123L	1
F176S	1
F213I	1
F263L	1
F279C	1
F43V	1
F7Y	1
G13R	1
G150V	1
G20S	1
G246D	1
G253V	1
G286	1
G286L	1
G76C	1
G76V	1
H14N	1
H95D	1
H95Y	1
I107M	1
I115L	1
I143N	1
I211F	1
I211V	1
I222N	1
I27S	1
I295V	1
I306T	1
I71V	1
I79V	1
K109E	1
K109T	1
K12M	1
K173	1
K173R	1
K204E	1
K256	1
K256R	1
K259N	1
K276R	1
K316R	1
K319E	1
K319N	1
K344Q	1
K34T	1
K70*	1
L119F	1
L167*	1
L227	1
L251M	1
L2V	1
L345F	1
M218L	1
M218V	1
M271V	1
N163T	1
N277Y	1
N29D	1
N29H	1
N29K	1
N4H	1
N4K	1
N62T	1
P153S	1
P153T	1
P190T	1
P262H	1
P262I	1
Q152K	1
Q152L	1
Q187K	1
Q187L	1
Q188H	1
Q188K	1
Q18R	1
Q196R	1
Q208K	1
Q208L	1
Q284H	1
Q284R	1
Q346L	1
R126K	1
R138L	1
R138P	1
R206K	1
R206M	1
R224Q	1
R257L	1
R90K	1
S147	1
S147C	1
S161C	1
S161T	1
S197	1
S207C	1
S241I	1
S241R	1
S261P	1
S261T	1
S273C	1
S273G	1
S273N	1
S287T	1
S293A	1
S312Y	1
S97A	1
S97F	1
SH241RY	1
T112A	1
T112N	1
T112S	1
T120N	1
T144Q	1
T144S	1
T166I	1
T192N	1
T281	1
T281S	1
T285P	1
T285S	1
T30I	1
T340A	1
T340I	1
T47I	1
T48K	1
T83I	1
V101L	1
V10E	1
V141G	1
V172E	1
V185A	1
V185F	1
V186F	1
V236A	1
V303I	1
V314	1
V314A	1
V314F	1
V31I	1
V38F	1
V40I	1
V69A	1
V69M	1
V69S	1
V9A	1
W58C	1
Y178	1
Y193	1
Y193*	1
Y342H	1
Y88C	1

[truncated: 16 more sheets: NSP16, NSP2, NSP3, NSP4, NSP5, NSP6, NSP7, NSP8, NSP9, ORF10, ORF3a, ORF6, ORF7a, ORF7b, ORF8, S]
